# Supplementary material
Source: PubMed Central journal article supplement (PMC4675863)
Supplement: mmc1.pdf [file mmc1.pdf]

## SUPPORTING MATERIAL

### Pressure and Temperature Effects on the Activity and Structure of the Catalytic Domain of Human MT1-MMP

Elena Decaneto,<sup>1,3</sup> Saba Suladze,<sup>2</sup> Christopher Rosin,<sup>2</sup> Martina Havenith,<sup>3</sup> Wolfgang Lubitz,<sup>1</sup> and Roland Winter<sup>2</sup>

<sup>1</sup>Max Planck Institute for Chemical Energy Conversion, Mülheim a. d. Ruhr, Germany; <sup>2</sup>Department of Chemistry and Chemical Biology, Physical Chemistry, Technische Universität Dortmund, Dortmund, Germany; <sup>3</sup>Department of Physical Chemistry II, Ruhr-University Bochum, Bochum, Germany.

#### Pressure effect on the rate constant

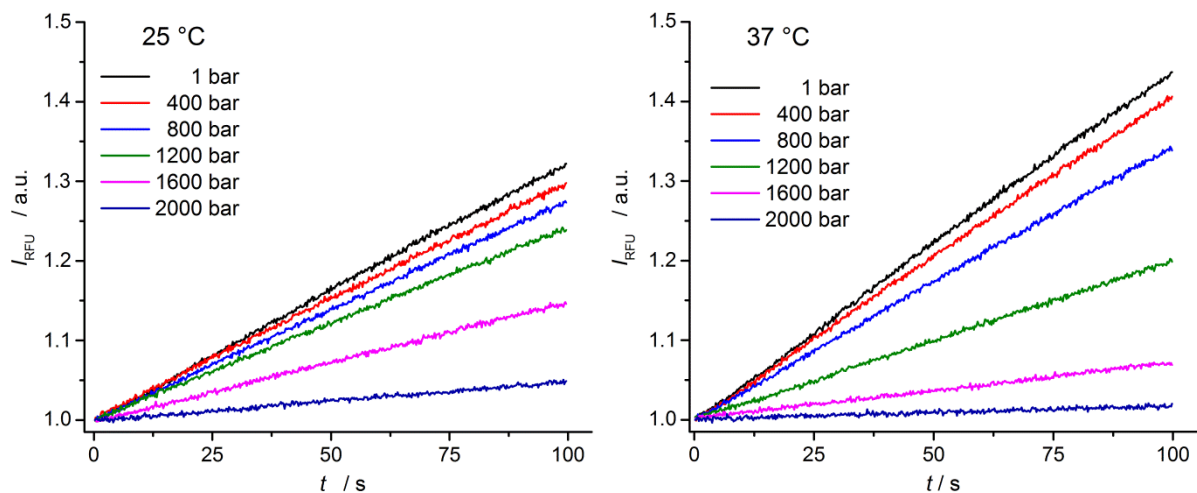

**Fig. S 1** Pressure-dependent activity measurements for the hydrolysis of a collagen-like peptide by the catalytic domain of MT1-MMP. The signal detected corresponds to the relative fluorescence intensity as a function of time at 25 °C (left) and 37 °C (right). Reaction slopes exhibited nearly linear behavior during the course of the reaction, implying saturating enzyme concentration with substrate.

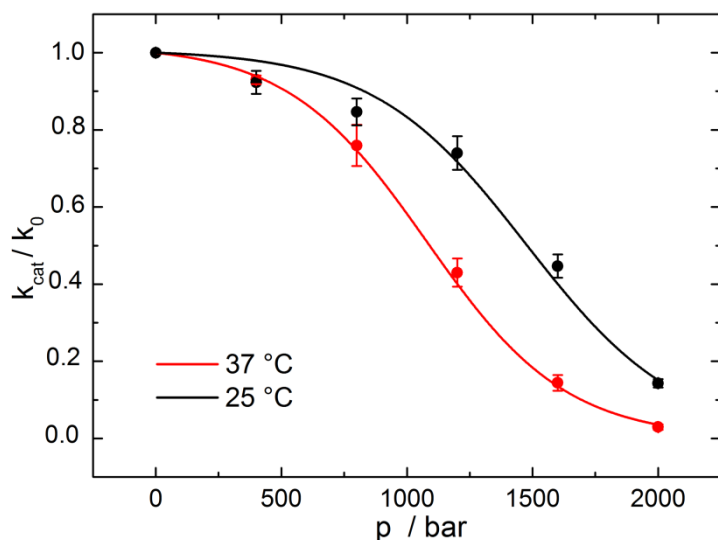

**Fig. S 2** Pressure dependence of the enzymatic activity of MT1-MMP at 25 °C (298 K) and 37 °C (310 K).  $k_{\text{cat}}/k_0$  corresponds to the ratio between the rate constant at pressure  $p$  and the rate constant at atmospheric pressure (1 bar).

Assuming a pressure-induced displacement of a conformational equilibrium between two conformational states,  $A \rightleftharpoons B$ , of the enzyme with different activity, data were fitted with the integral form of the equation for the pressure-dependence of the equilibrium constant,  $K_{\text{eq}}$  (1,2):

$$K_{\text{eq}} = \frac{[A]}{[B]} = e^{(p_{1/2}-p)\Delta V^\circ/RT}$$

Since  $k_{\text{cat}}/k_0$  can be assumed to be proportional to the fraction of MT1-MMP in the most active conformation of the enzyme,  $x_A$ , we can write:

$$x_A = \frac{[A]}{[A]+[B]} = \frac{1}{1+e^{-(p-p_{1/2})\Delta V^\circ/RT}}$$

The values of the pressure-induced standard molar volume change,  $\Delta V^\circ$ , and the “half pressure” of the conversion,  $p_{1/2}$ , at which  $[A] = [B]$ , amounts to  $\Delta V^\circ = -93 \pm 6 \text{ mL mol}^{-1}$  and  $p_{1/2} = 1080 \pm 25 \text{ bar}$  ( $r^2 = 0.9998$ ) at 37 °C and  $\Delta V^\circ = -85 \pm 10 \text{ mL mol}^{-1}$  and  $p_{1/2} = 1475 \pm 60 \text{ bar}$  ( $r^2 = 0.997$ ) at 25 °C, respectively.

## Temperature and pressure effect on secondary structure

Figures S 3 and S 4 display the temperature-dependent changes of the FSD and 2<sup>nd</sup> derivative spectra of the amide I' band of MT1-MMP. The FSD spectrum of the native protein (Fig. A, blue lines) exhibits nine peaks corresponding to nine underlying secondary structure elements, approved by the 2<sup>nd</sup> derivative spectra (Table 4 in the main article for assignment). Therefore, nine Gaussian shaped bands were fitted to the temperature dependent data revealing information about changes in secondary structure elements while temperature is increased.

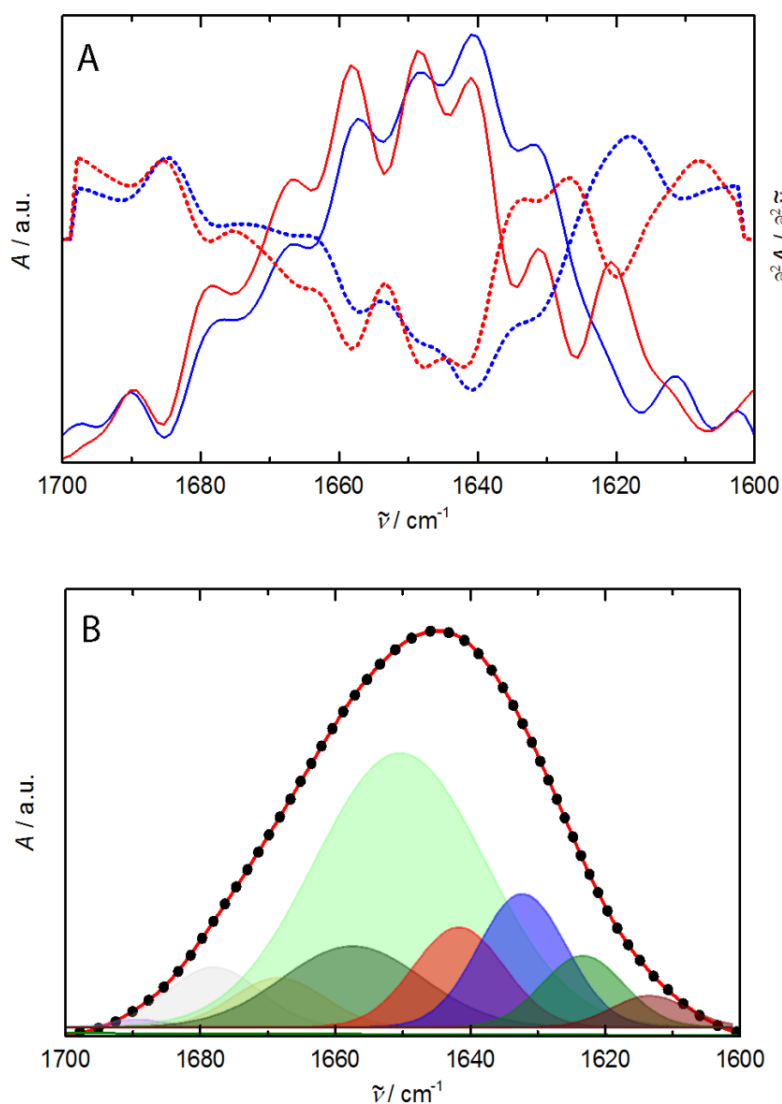

**Fig. S 3** (A) FSD (solid lines) and 2<sup>nd</sup> derivative (dashed lines) spectra of the amide I' band of MT1-MMP (20 °C in blue and 90 °C in red). (B) Amide I' band of MT1-MMP at 20 °C (black filled circles) and fitted curve (red line) generated by the superposition of the underlying Gaussian shaped subbands.

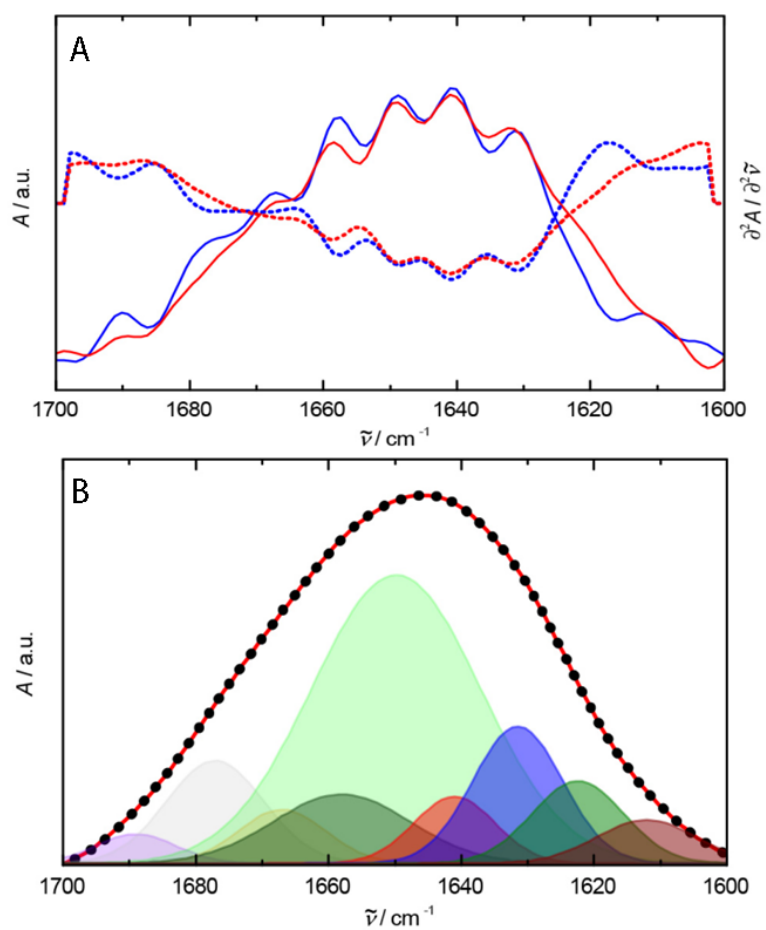

**Fig. S 4** (A) FSD (solid lines) and  $2^{\text{nd}}$  derivative (dashed lines) spectra of the amide I' band of MT1-MMP (pressure of 1 bar in blue and 11 kbar in red). (B) Amide I' band of MT1-MMP at 1 bar (black filled circles) and fitted curve (red line) generated by the superposition of the underlying Gaussian-shaped subbands.

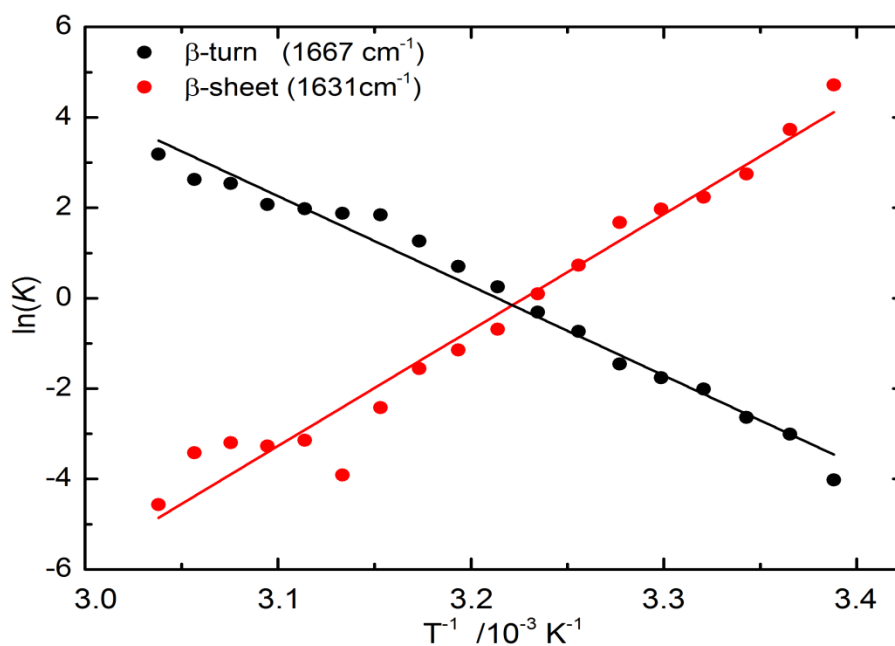

**Fig. S 5** Van't Hoff plots constructed from the temperature-dependence of the equilibrium constant for the structural transition at  $1667 \text{ cm}^{-1}$  ( $\beta$ -turn, black) and  $1631 \text{ cm}^{-1}$  ( $\beta$ -sheet, red). Data were fitted with  $\ln K = -\Delta H/RT + \Delta S/R$  where  $R$  is the gas constant. The linear correlation coefficients correspond to  $r = 0.989$  ( $\beta$ -turn, black) and  $r = 0.982$  ( $\beta$ -sheet, red), respectively.

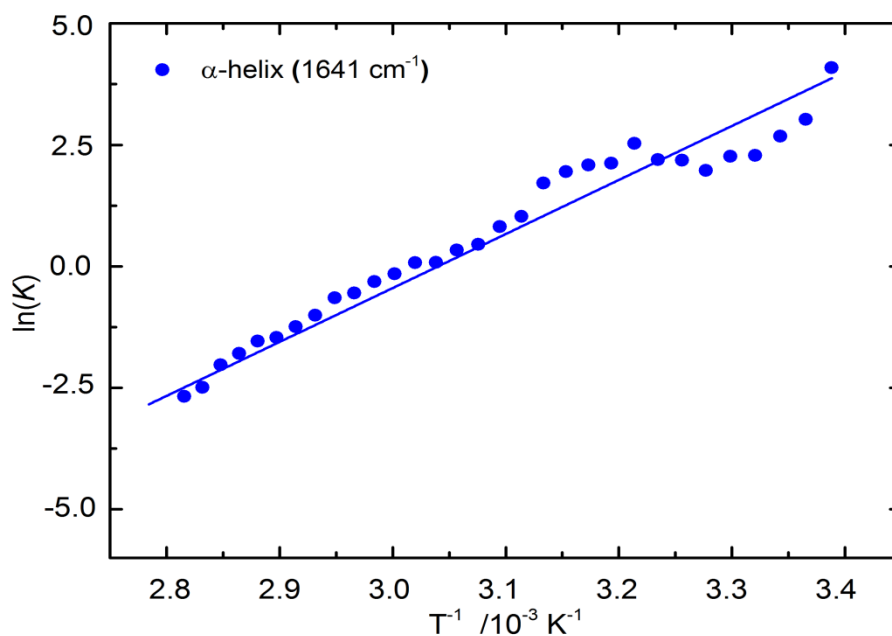

**Fig. S 6** Van't Hoff plots constructed from the temperature-dependence of the equilibrium constant for the structural transition at  $1641 \text{ cm}^{-1}$  ( $\alpha$ -helix). The linear correlation coefficient corresponds to  $r = 0.978$ .

## Supporting References

1. Weber G. 1992. Protein interactions. Chapman and Hall, New York.
2. Sineva E. V. and D. R. Davydov. 2010. Cytochrome P450 from *Photobacterium profundum* SS9. A piezophilic bacterium exhibits a tightened control of water access to the active site. *Biochemistry* 49:10636-10646.
